# Supplementary material for: Low Vitamin D Levels and Frailty Status in Older Adults: A Systematic Review and Meta-Analysis
Source: MDPI journal article supplement (doi:10.3390/nu12082286), 2020-07-30
Supplement: s1 [file s1]

**Table S1.** Quality score criteria of the studies included in the meta-analyses. When some data was not available 0 points were assigned

| Study reference                      | Total population size<br>(1) | Age matching<br>(2) | Gender matching<br>(3) | Frailty matching<br>(4) | Frailty measured by specialized personnel<br>(5) | Number of frailty groups<br>(6) | Total quality score |
|--------------------------------------|------------------------------|---------------------|------------------------|-------------------------|--------------------------------------------------|---------------------------------|---------------------|
| Chang et al. (2010) [70]             | 2                            | 3                   | 2                      | 1                       | 1                                                | 2                               | 11                  |
| Ensrud et al. (2010) [16]            | 3                            | 0                   | 1                      | 1                       | 1                                                | 2                               | 8                   |
| Ensrud et al. (2012) [71]            | 3                            | 0                   | 1                      | 1                       | 1                                                | 2                               | 8                   |
| Fried et al. (2009) [63]             | 3                            | 0                   | 1                      | 1                       | 1                                                | 2                               | 8                   |
| Gutiérrez-Robledo et al. (2015) [72] | 3                            | 3                   | 3                      | 1                       | 1                                                | 1                               | 12                  |
| Hirani et al. (2013) [73]            | 3                            | 0                   | 1                      | 1                       | 1                                                | 1                               | 7                   |
| Krams et al. (2016) [19]             | 3                            | 3                   | 1                      | 3                       | 1                                                | 1                               | 12                  |
| Sanchís et al. (2015) [78]           | 3                            | 3                   | 2                      | 1                       | 1                                                | 1                               | 11                  |
| Sergi et al. (2015) [17]             | 3                            | 3                   | 2                      | 1                       | 1                                                | 1                               | 11                  |
| Smit et al. (2012) [18]              | 3                            | 3                   | 2                      | 1                       | 1                                                | 2                               | 12                  |
| Tajar et al. (2013) [80]             | 3                            | 3                   | 1                      | 1                       | 1                                                | 2                               | 11                  |
| Vogt et al. (2015) [81]              | 3                            | 0                   | 3                      | 1                       | 1                                                | 1                               | 9                   |
| Wang et al. (2014) [82]              | 3                            | 2                   | 1                      | 3                       | 1                                                | 2                               | 12                  |

(1) Less than 100 subjects: 1 point, 100-300 subjects: 2 points, more than 300 subjects: 3 points.

(2) Mean age difference higher than 10 years: 1 point, difference 5-10 years: 2 points, difference lower than 5 years: 3 points.

(3) Rate of one gender either higher than 0.60 or lower than 0.40: 1 point, rate either 0.55-0.60 or 0.40-0.45: 2 points, rate from higher than 0.45 to lower than 0.55: 3 points.

(4) In studies with three frailty groups: 3 points when the rate of none of the groups was lower than 0.3, 2 points when the rate of none of the groups was lower than 0.25, and 1 point in the rest of cases; in studies with two frailty groups: rules the same than those applied to gender-matching.

(5) Absence of description: 1 point, specialization of the personnel not specified or they were not geriatricians or nurses: 2 points, geriatricians or nurses: 3 points.

(6) Only non-frail and frail groups reported: 1 point, a pre-frail group also included: 2 points.
